# Supplementary material
Source: PubMed Central journal article supplement (PMC3814166)

**Fig S1**

**a**

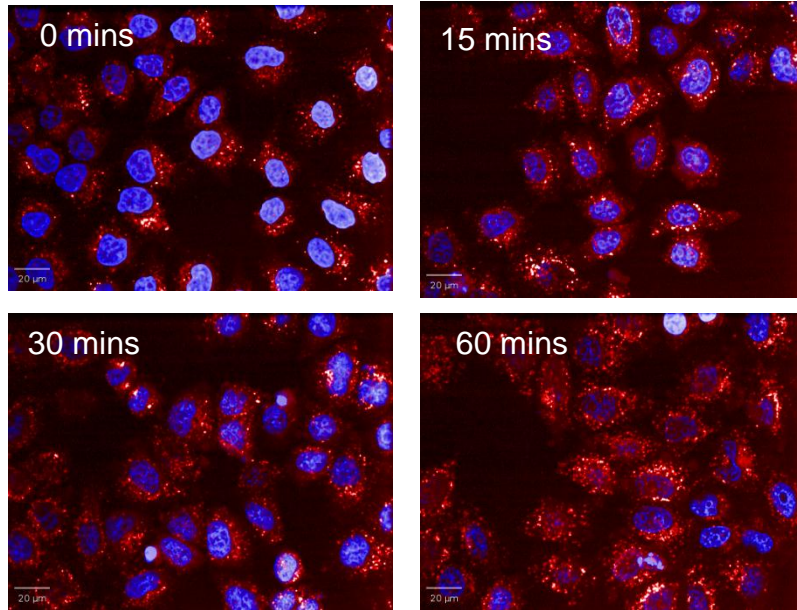

**b**

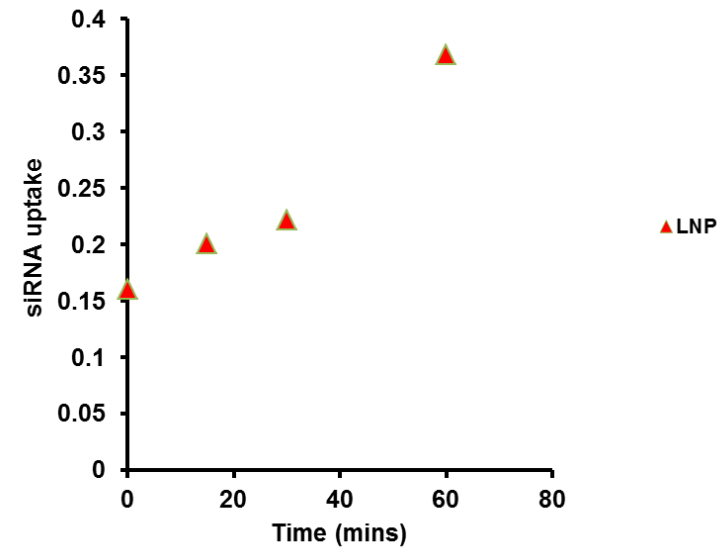

**Fig S2**

**a**

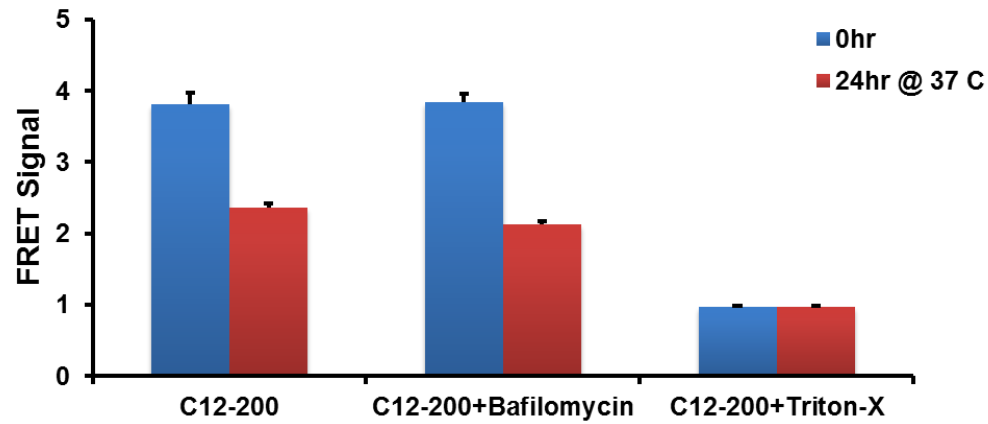

**b**

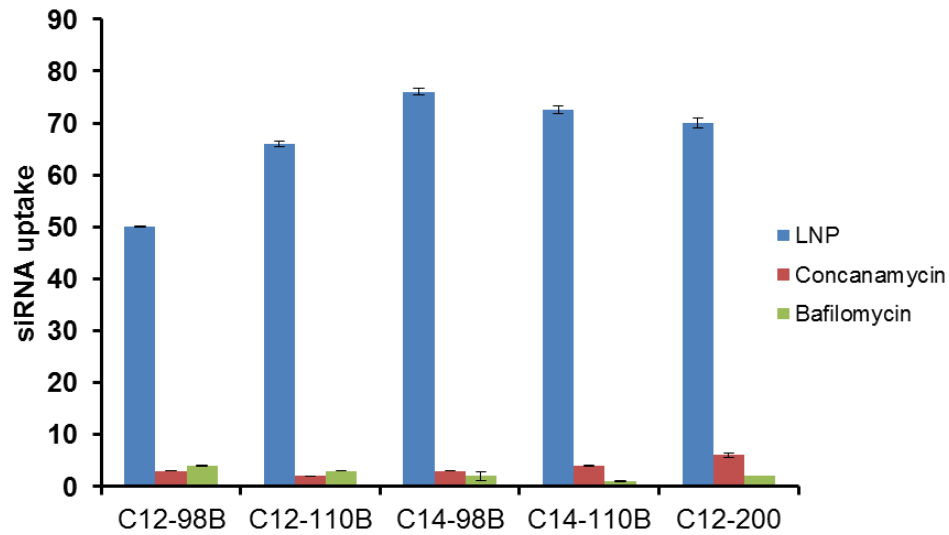

**c**

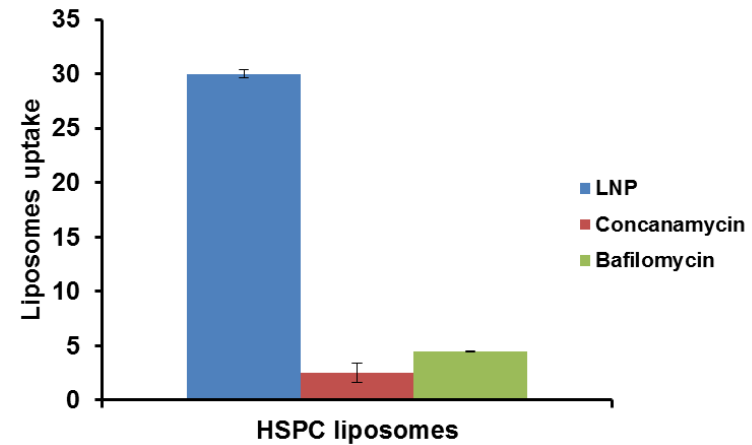

**Fig. S3****a**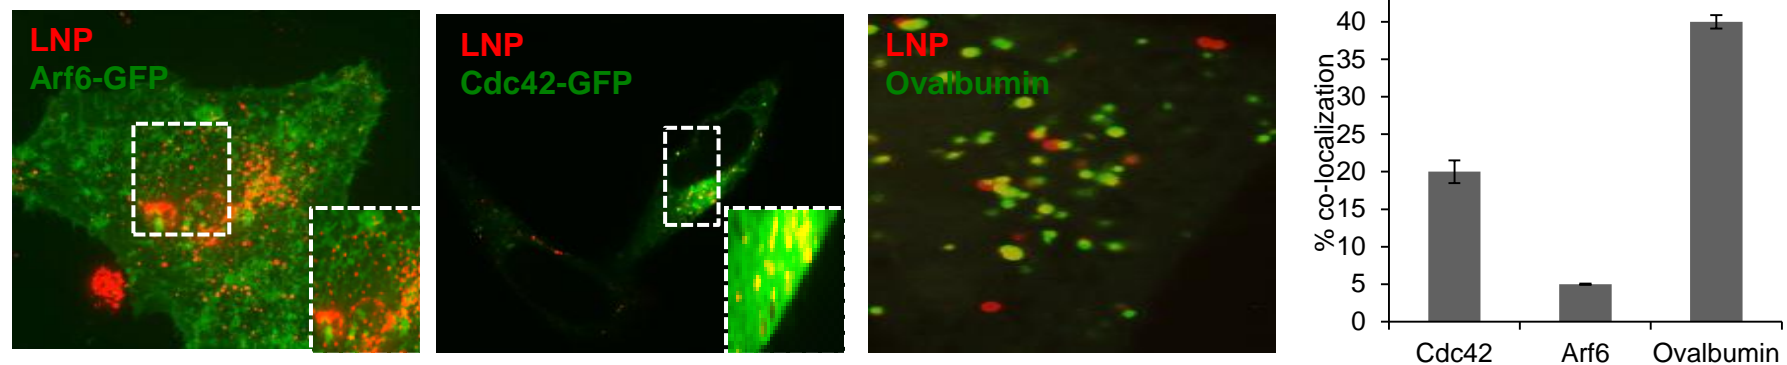**b**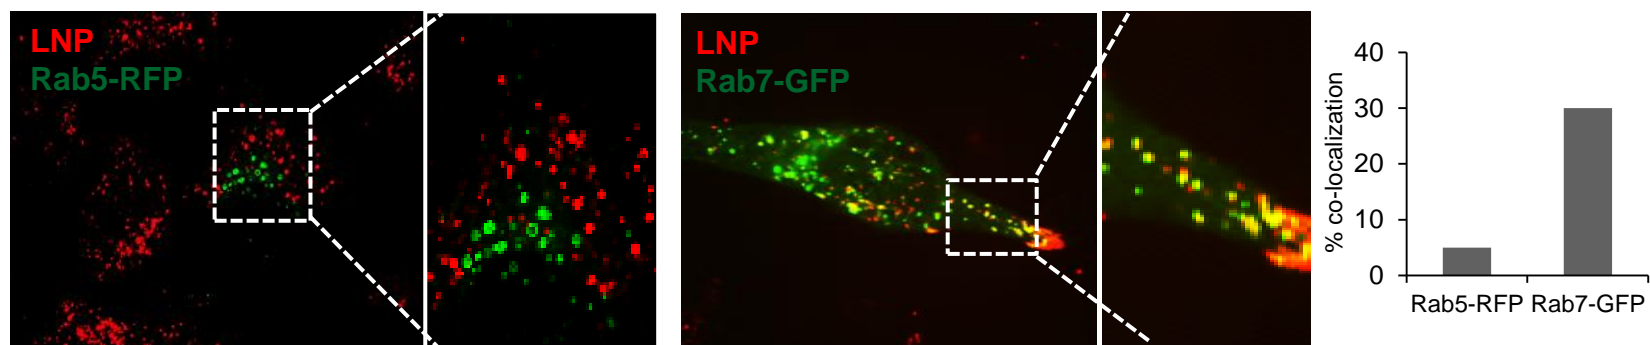**c**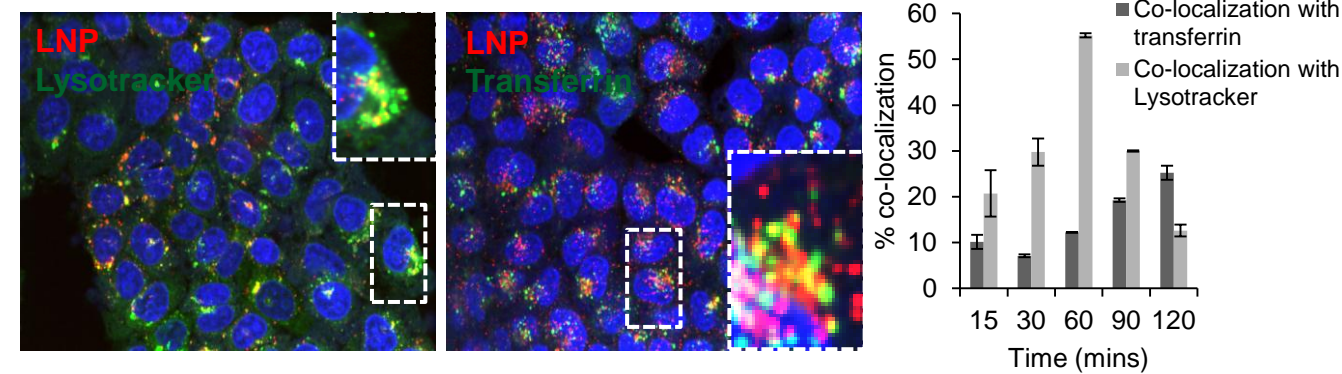**d.**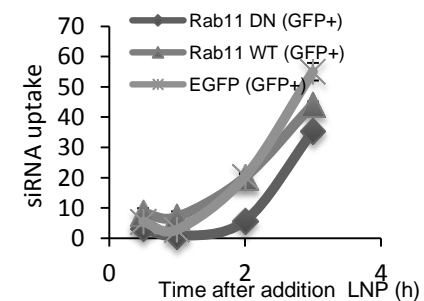**e.**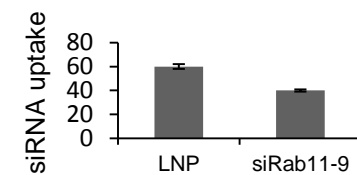

# Fig S4

**a**

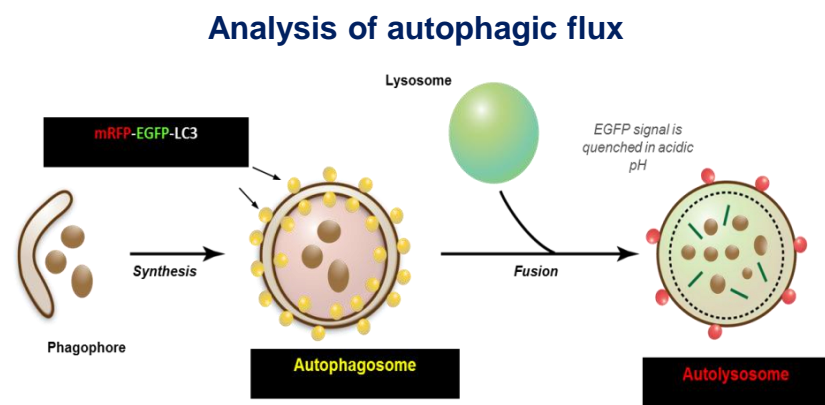

**b**

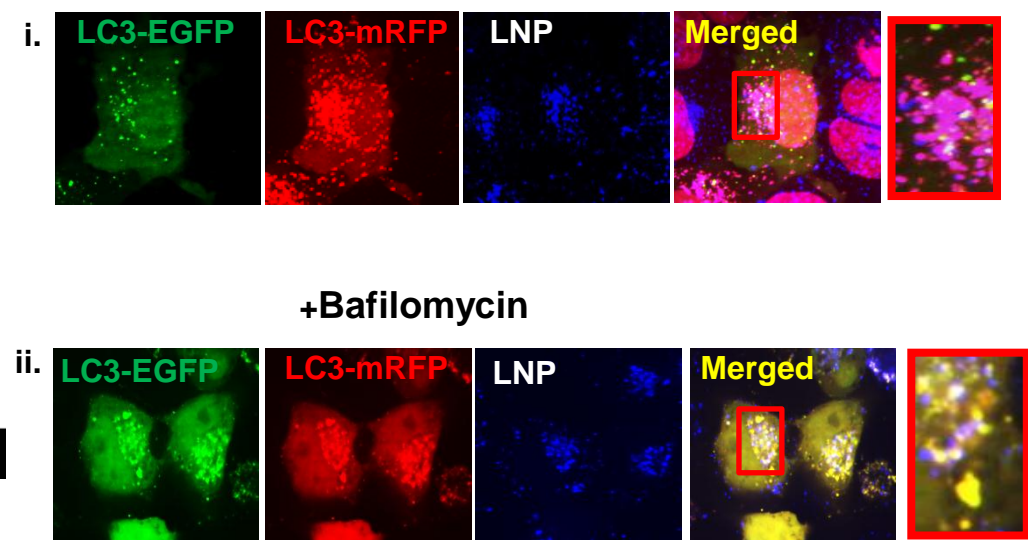

**c**

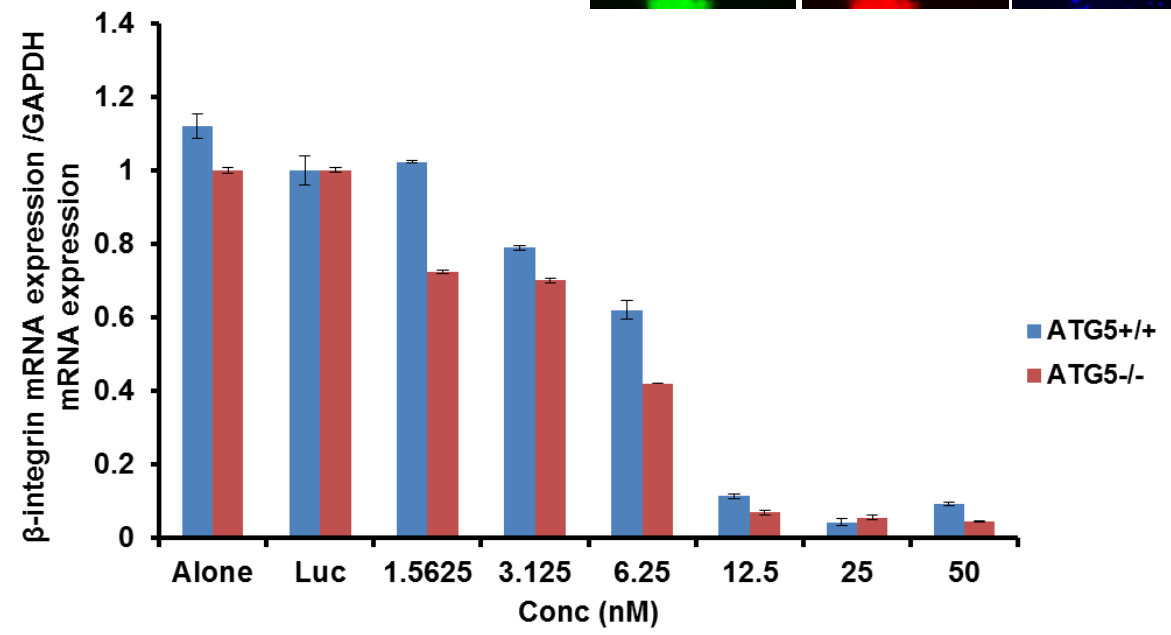

**Fig S5**

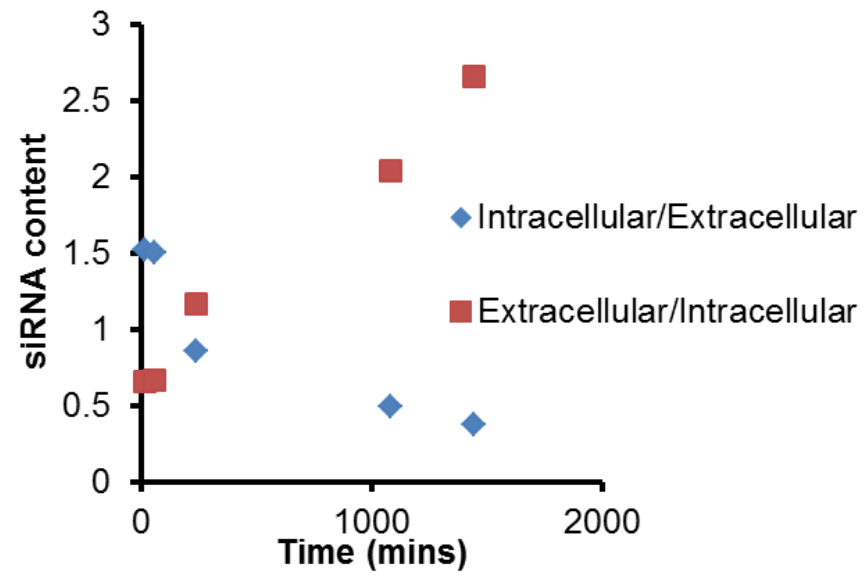

Fig S6

*NPC1*<sup>+/+</sup> MEFs

*NPC1*<sup>-/-</sup> MEFs

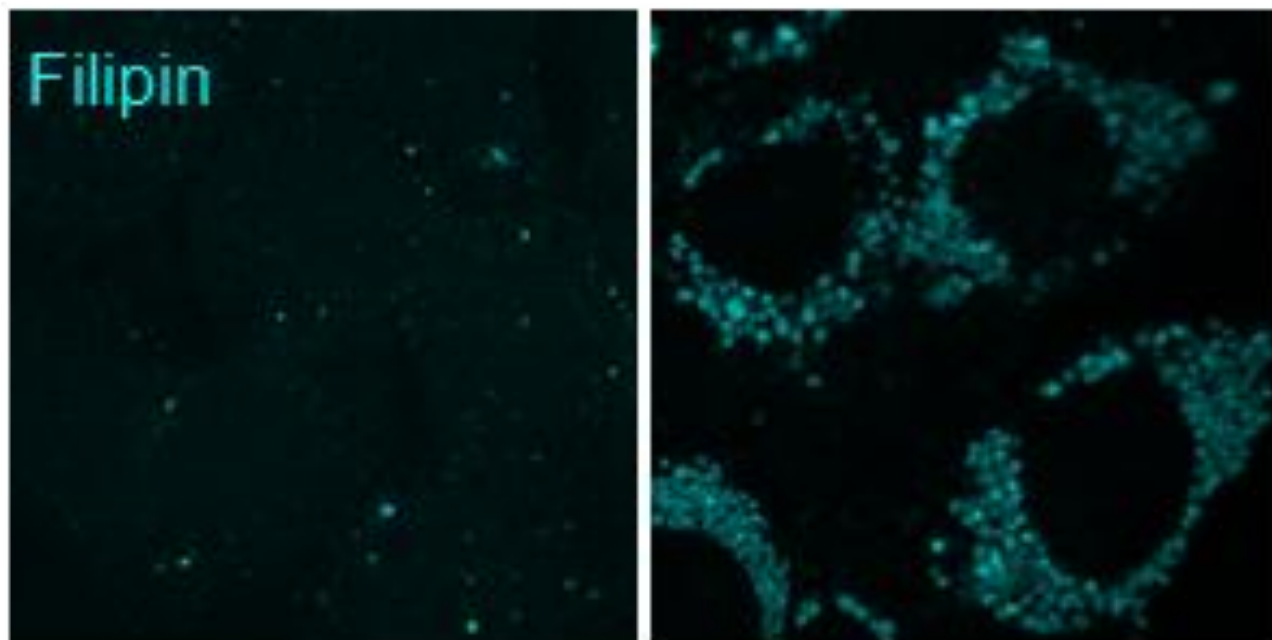

**Fig S7**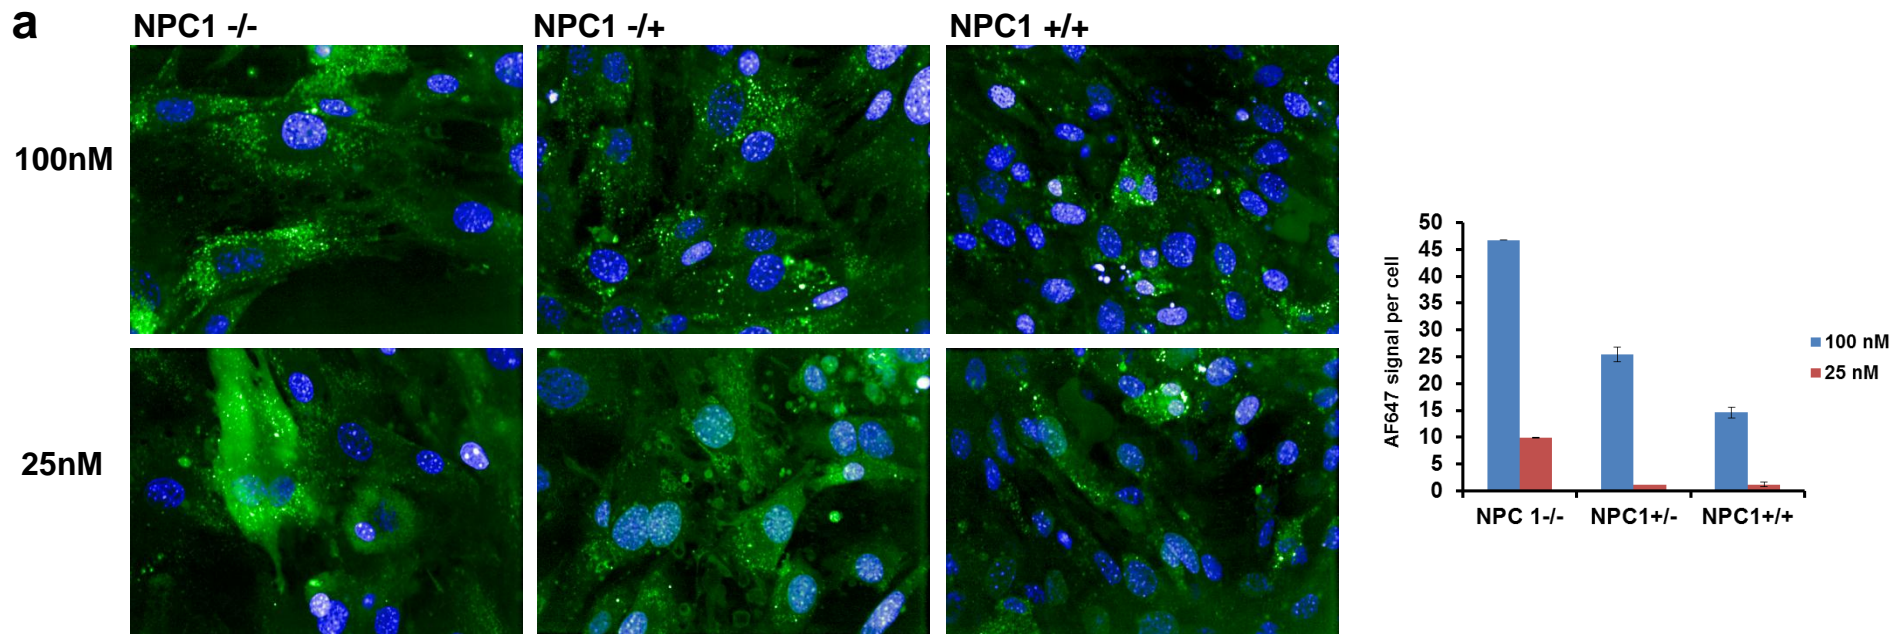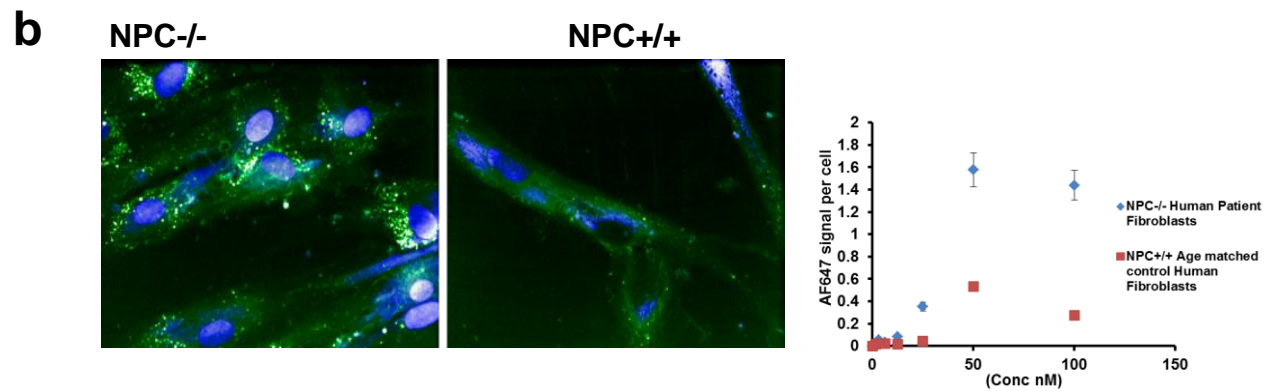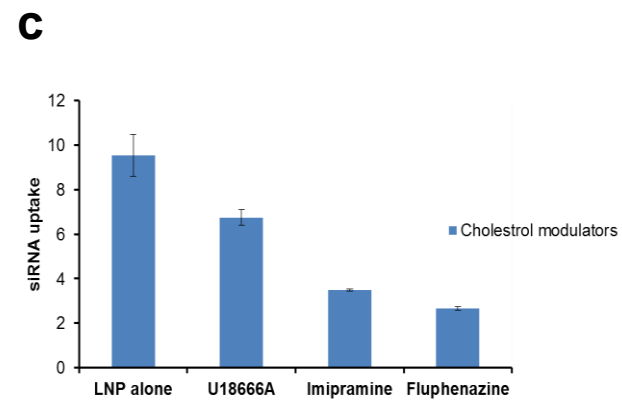

**Fig S8****a**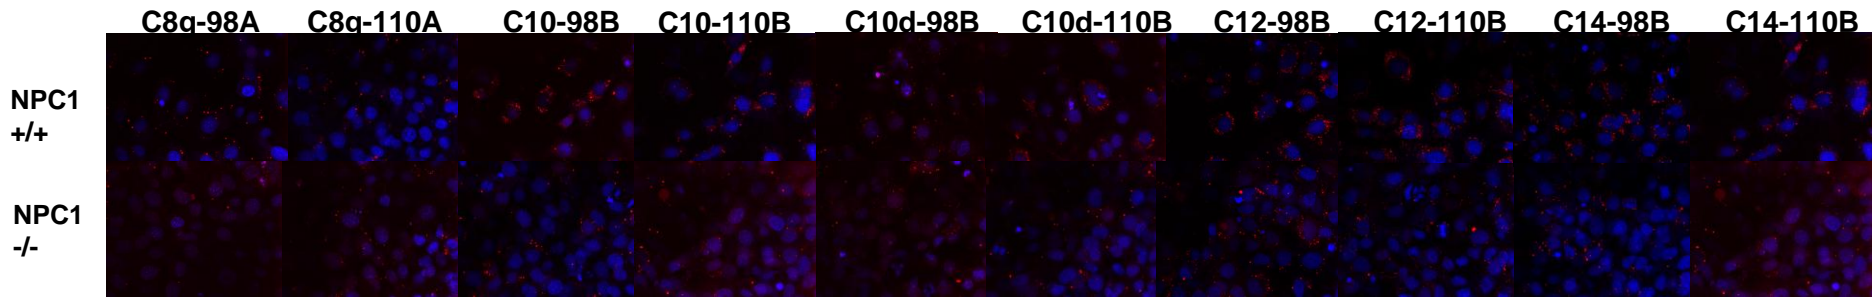**b**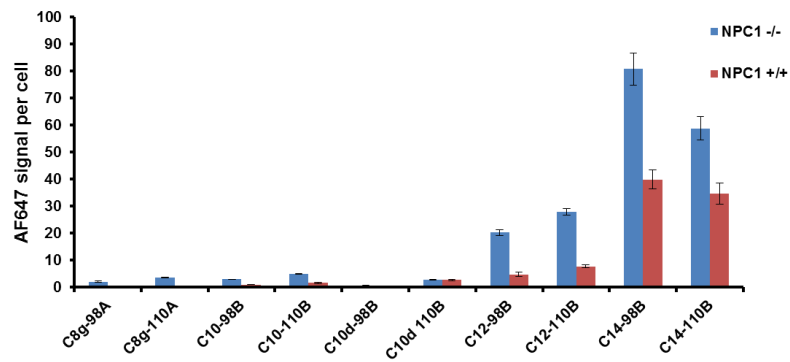**c**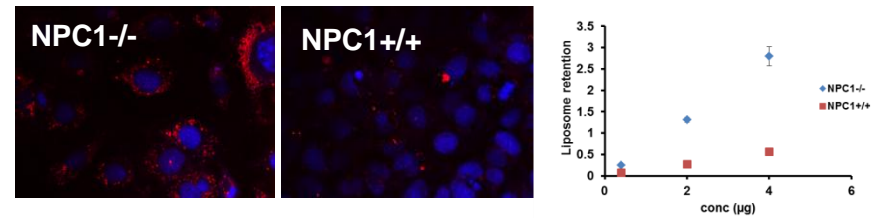**d**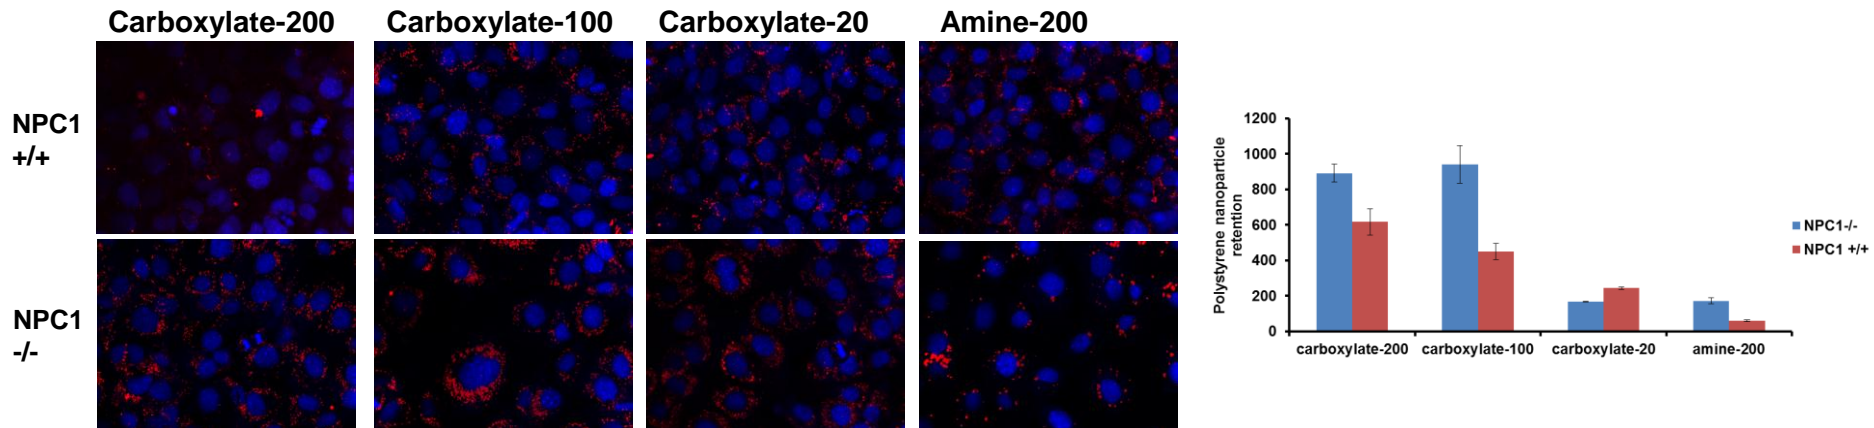



**Fig S9**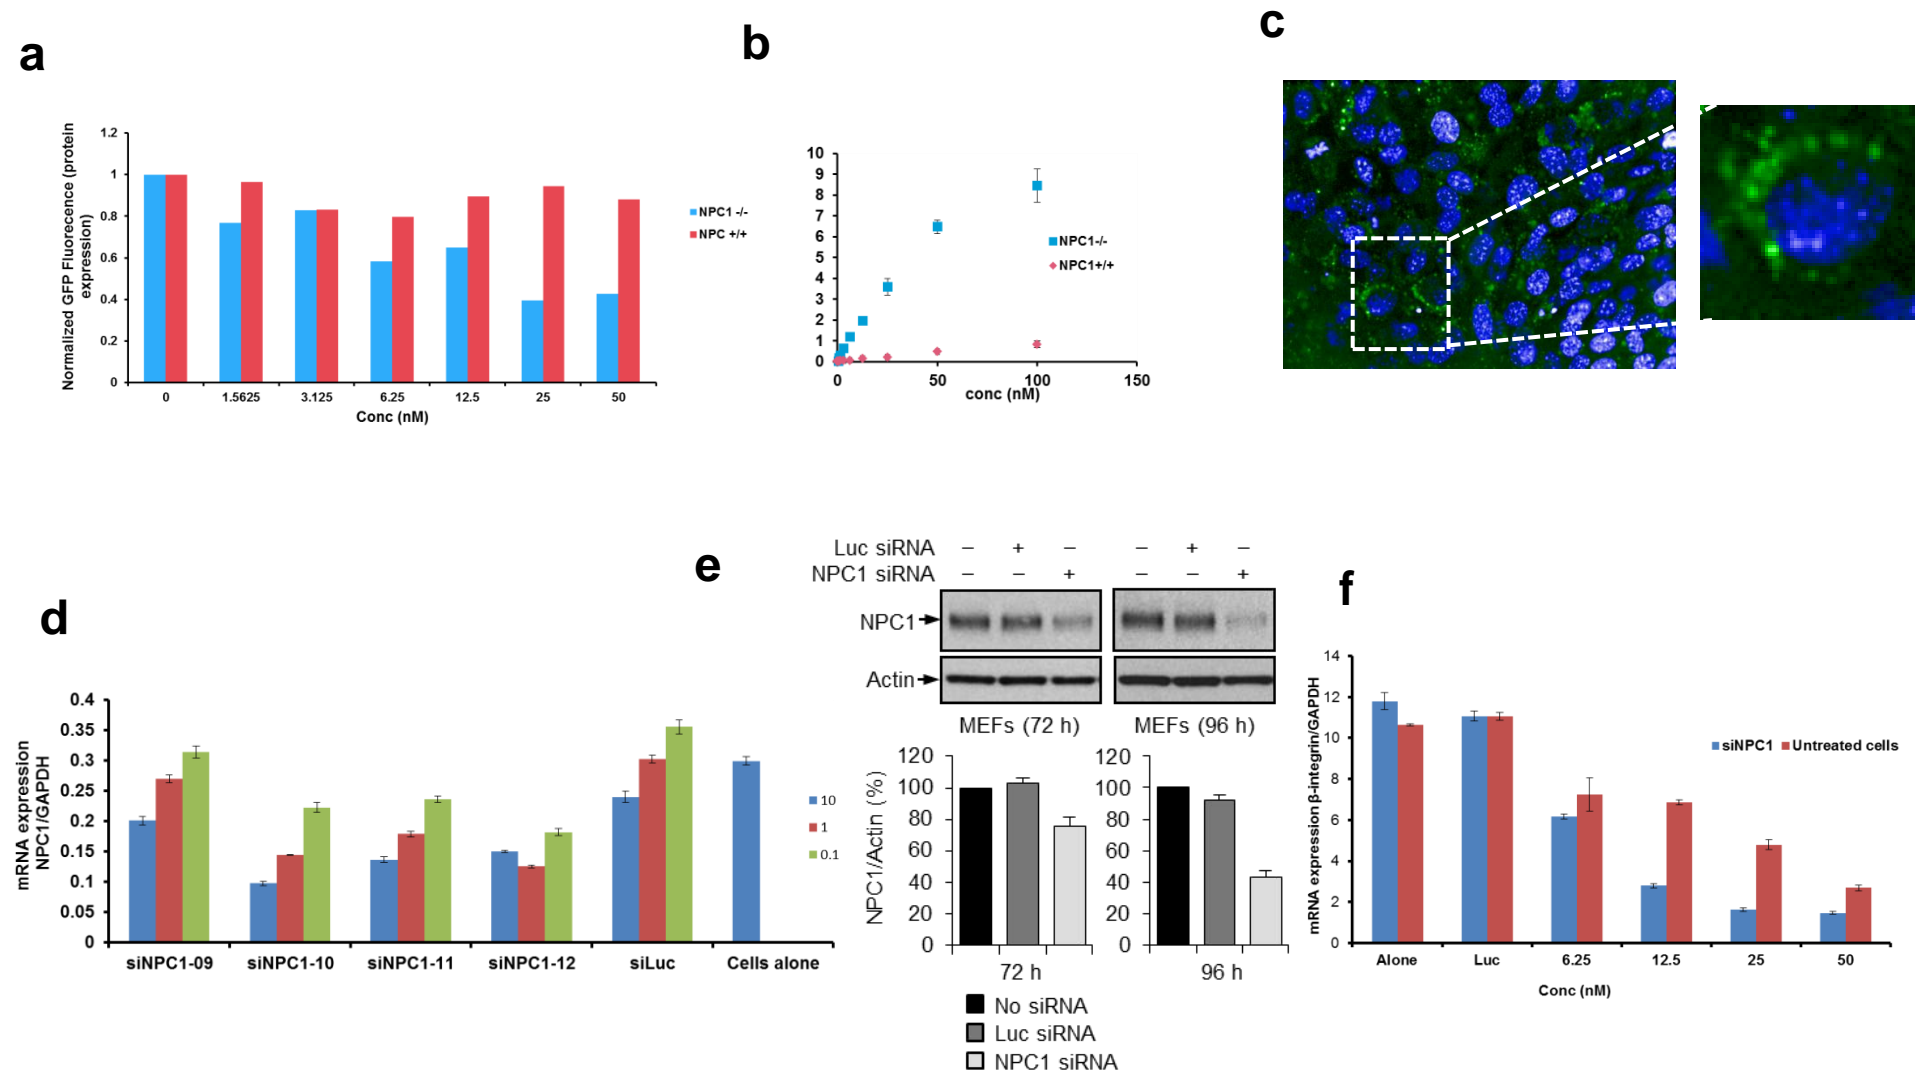

**Fig S10**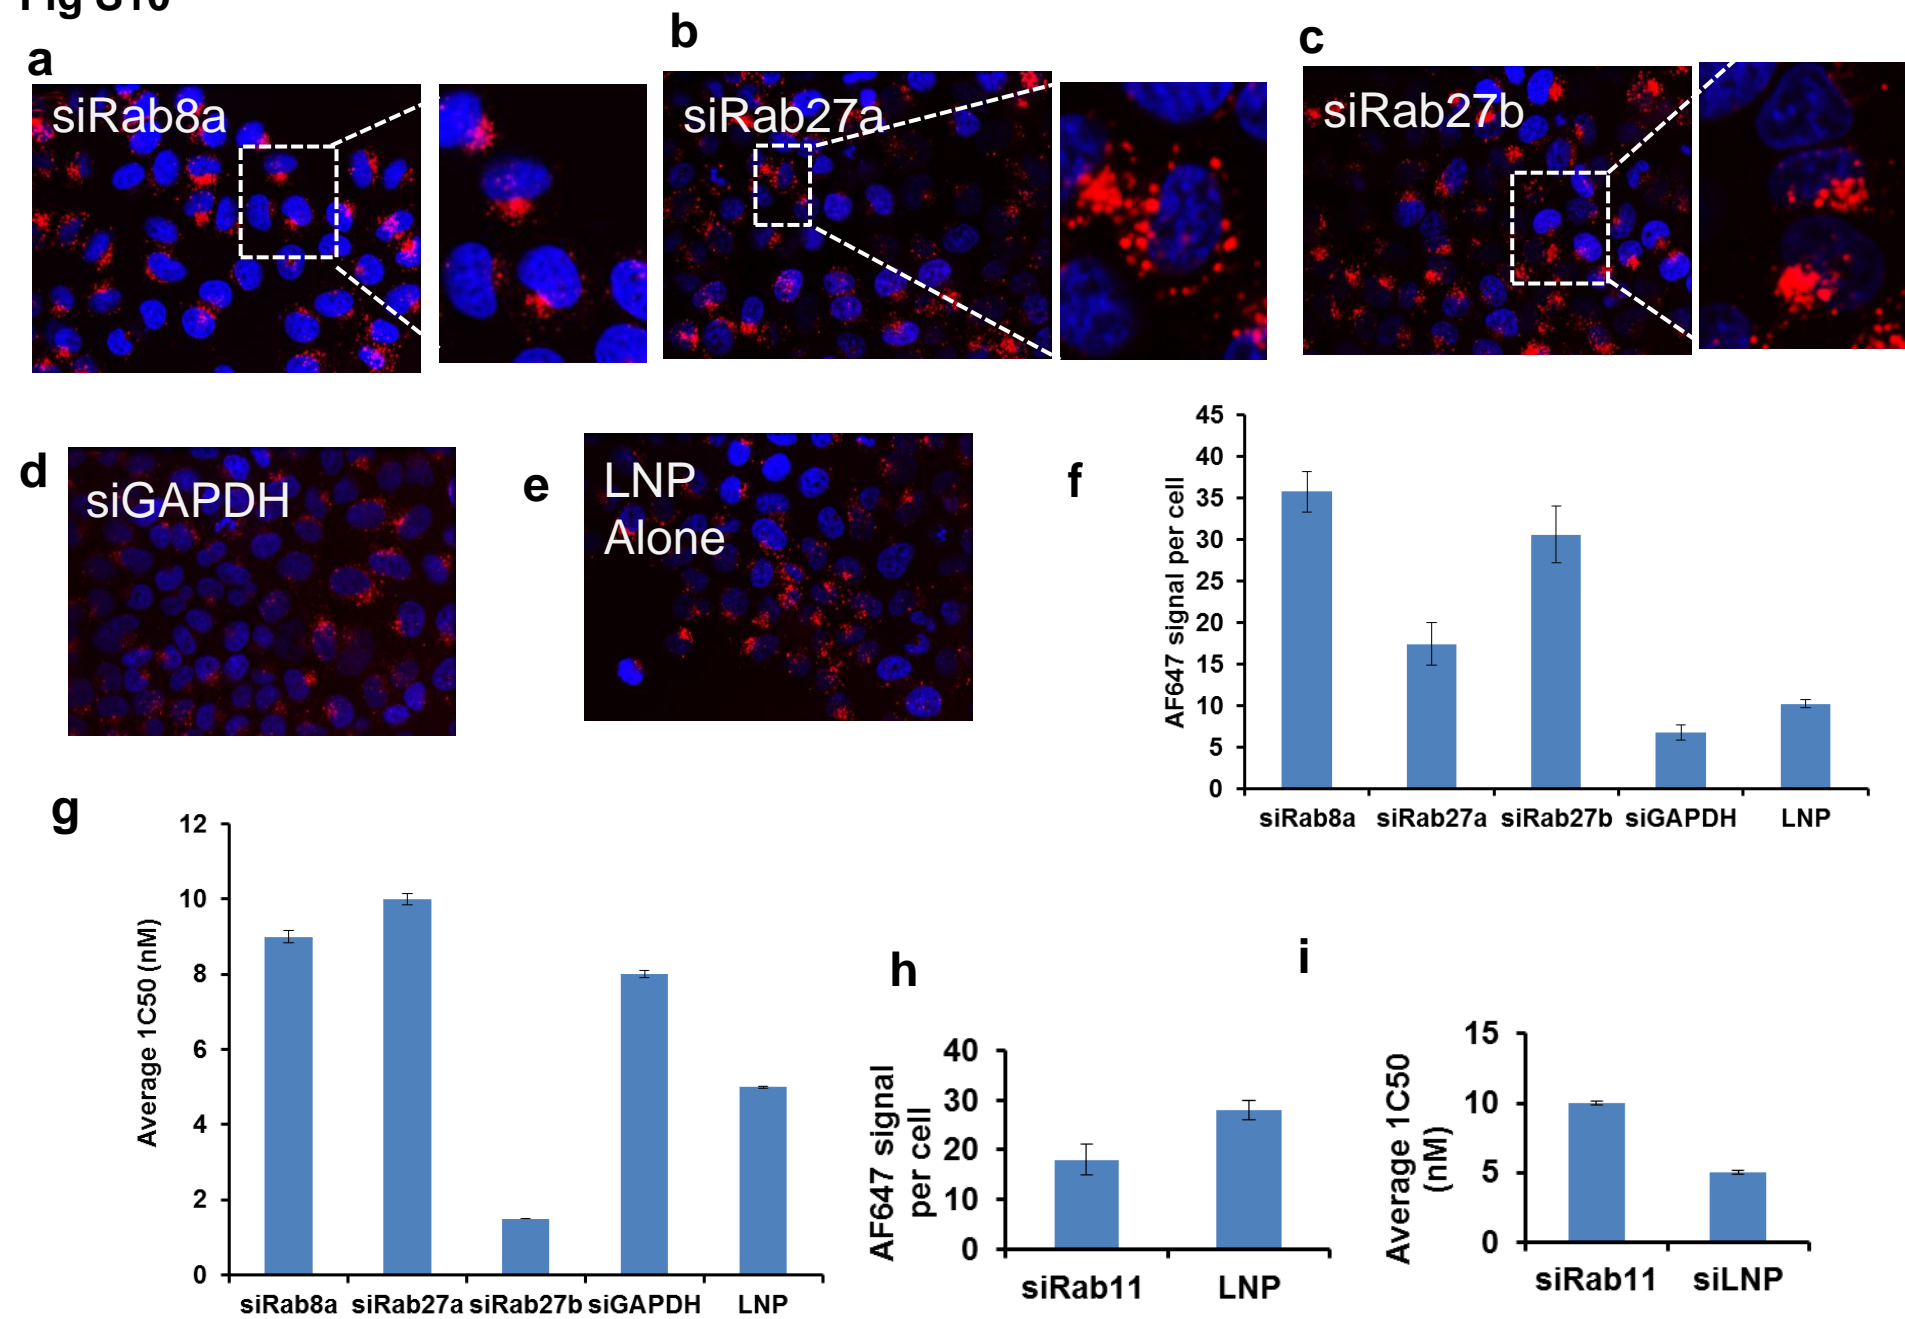

Supplement: NIHMS482144-supplement-2.pdf [file NIHMS482144-supplement-2.pdf]
