# Supplementary material
Source: PubMed Central journal article supplement (PMC3814166)
Supplement: NIHMS482144-supplement-3.pdf [file NIHMS482144-supplement-3.pdf]

| Small Molecules        | Mwt    | Sample ID | Plate num | INDUCER            | CAS Datab   | Enzo ID     | Stock | Cell signaling                                |
|------------------------|--------|-----------|-----------|--------------------|-------------|-------------|-------|-----------------------------------------------|
| Rapamycin              | 913.6  | 1-A02     | 1         | Autophagy inducers | 53123-88-9  | BML-A275    | 10mM  | mTOR inhibitor                                |
| Timosaponin A-III      | 740.4  | 1-A03     | 1         | Autophagy inducers | 41059-79-4  | BML-AP504   | 10mM  | mTOR inhib/ER stress                          |
| NVP-BEZ235             | 469.2  | 1-A04     | 1         | Autophagy inducers | 915019-65-7 | AC1502      | 10mM  | Dual PI3K/mTOR Inhibitor                      |
| PI-103                 | 348.1  | 1-A05     | 1         | Autophagy inducers | 371935-74-5 | 460         | 10mM  | Dual PI3K/mTOR inhib                          |
| AS605240               | 257.0  | 1-A06     | 1         | Autophagy inducers | 648450-29-7 | ALX-270-462 | 10mM  | PI3Kg inhibitor                               |
| Lithium Chloride       | 42.0   | 1-A08     | 1         | Autophagy inducers | 7447-41-8   | AC1503      | 10mM  | IMPase inhibitor/GSK-3b inhib                 |
| L-690,330              | 298.0  | 1-A07     | 1         | Autophagy inducers | 142523-38-4 | 078         | 10mM  | IMPase inhibitor                              |
| Carbamazepine          | 236.1  | 1-A09     | 1         | Autophagy inducers | 298-46-4    | 084         | 10mM  | inhibits IP3 via inhibition of inositol synth |
| Sodium Valproate       | 166.1  | 1-A10     | 1         | Autophagy inducers | 1069-66-5   | 304         | 10mM  | inhibits IP3 via inhibition of inositol synth |
| Verapamil-HCl          | 490.3  | 1-A11     | 1         | Autophagy inducers | 152-11-4    | 306         | 10mM  | Ca2+ Blocker                                  |
| Loperamide-HCl         | 512.2  | 1-B02     | 1         | Autophagy inducers | 34552-83-5  | 253         | 10mM  | Ca2+ Blocker                                  |
| Amiodarone-HCl         | 681.0  | 1-B03     | 1         | Autophagy inducers | 1951-25-3   | AC105       | 10mM  | Ca2+ Blocker/mTORC1 inhib.                    |
| Nimodipine             | 418.2  | 1-B04     | 1         | Autophagy inducers | 66085-59-4  | 277         | 10mM  | Ca2+ Blocker                                  |
| Nitrendipine           | 360.1  | 1-B05     | 1         | Autophagy inducers | 39562-70-4  | 278         | 10mM  | Ca2+ Blocker                                  |
| Niguldipine            | 645.3  | 1-B06     | 1         | Autophagy inducers | 102993-22-6 | BML-CA216   | 10mM  | Ca2+ Blocker(T-type)                          |
| Penitrem A             | 637.2  | 1-B07     | 1         | Autophagy inducers | 12627-35-9  | BML-KC157   | 10mM  | Ca2+/K+ channel blocker                       |
| Ionomycin              | 678.5  | 1-B08     | 1         | Autophagy inducers | 56092-81-0  | 006         | 10mM  | Ca2+ ionophore                                |
| Rotenone               | 394.1  | 1-B09     | 1         | Autophagy inducers | 83-79-4     | 360         | 10mM  | mETC-complex1-inhib                           |
| TTFA                   | 222.0  | 1-B10     | 1         | Autophagy inducers | 326-91-0    | AC1504      | 10mM  | mETC-complex2-inhib                           |
| Fluspirilene           | 475.2  | 1-B11     | 1         | Autophagy inducers | 1841-19-6   | BML-AC116   | 10mM  | Dopamine antagonist                           |
| Trifluoperazine-2HCl   | 479.1  | 1-C02     | 1         | Autophagy inducers | 117-89-5    | 310         | 10mM  | Dopamine antagonist                           |
| Sorafenib tosylate     | 636.1  | 1-C03     | 1         | Autophagy inducers | 475207-59-1 | AC1514      | 10mM  | PDGFR3/FLT3/ER Stress                         |
| Nicosamide             | 326.0  | 1-C04     | 1         | Autophagy inducers | 50-65-7     | AC1506      | 10mM  | mTORC1 inhib                                  |
| Rottlerin              | 516.2  | 1-C05     | 1         | Autophagy inducers | 82-08-6     | 075         | 10mM  | mTORC1 inhib                                  |
| Caffeine               | 194.1  | 1-C06     | 1         | Autophagy inducers | 58-08-2     | 322         | 10mM  | mTor pathway inhibition                       |
| Metformin-HCl          | 165.1  | 1-C07     | 1         | Autophagy inducers | 1115-70-4   | 432         | 10mM  | mTORC1 inhib RAG/GTPase                       |
| Clonidine-HCl          | 265.0  | 1-C08     | 1         | Autophagy inducers | 4205-90-7   | 087         | 10mM  | I1R agonist                                   |
| Rilmenidine            | 296.1  | 1-C09     | 1         | Autophagy inducers | 54187-04-1  | BML-AC154   | 10mM  | I1R agonist,                                  |
| 2',5'-Dideoxyadenosine | 235.1  | 1-C10     | 1         | Autophagy inducers | 6698-26-6   | CN110       | 10mM  | adenylyl cyclase inhib.                       |
| Suramin-6Na            | 1427.9 | 1-C11     | 1         | Autophagy inducers | 129-46-4    | 022         | 10mM  | Gas inhibitor                                 |
| Pimozide               | 461.2  | 1-D02     | 1         | Autophagy inducers | 2062-78-4   | BML-AC109   | 10mM  | D1,D2,D3 adrenergic blocker                   |
| STF-62247              | 267.1  | 1-D03     | 1         | Autophagy inducers | 315702-99-5 | BML-AP501   | 10mM  | trans golgi network                           |
| Spermidine             | 145.2  | 1-D04     | 1         | Autophagy inducers | 124-20-9    | AC1515      | 10mM  | inhibits HATS                                 |
| FK-866                 | 391.2  | 1-D05     | 1         | Autophagy inducers | 658084-64-1 | 501         | 10mM  | inhibits NAD                                  |
| Tamoxifen citrate      | 563.3  | 1-D06     | 1         | Autophagy inducers | 54965-24-1  | 095         | 10mM  | inhibits Ceramide                             |
| Minoxidil              | 209.1  | 1-D07     | 1         | Autophagy inducers | 38304-91-5  | BML-KC125   | 10mM  | K+ channel opener                             |
| Imiquimod              | 240.1  | 1-D08     | 1         | Autophagy inducers | 99011-02-6  | ALX-420-035 | 10mM  | TLR7                                          |
| Imatinib mesylate      | 589.2  | 1-D09     | 1         | Autophagy inducers | 220127-57-1 | 492         | 10mM  | Tyrosine kinase inhib.                        |
| AG112                  | 236.1  | 1-D10     | 1         | Autophagy inducers | 144978-82-5 | 133         | 10mM  | Tyrosine kinase inhib.                        |
| SU11652                | 414.2  | 1-D11     | 1         | Autophagy inducers | 326914-10-7 | BML-EI408   | 10mM  | Tyrosine kinase inhib.                        |
| SB202190               | 331.1  | 1-E02     | 1         | Autophagy inducers | 152121-30-7 | BML-EI294   | 10mM  | p38 MAPK inhibitor                            |
| Brefeldin A            | 280.2  | 1-E03     | 1         | Autophagy inducers | 20350-15-6  | BML-G405    | 10mM  | ER stress                                     |
| Tunicamycin            | 702.3  | 1-E04     | 1         | Autophagy inducers | 11089-65-9  | BML-CC104   | 10mM  | ER Stress                                     |
| Thapsigargin           | 650.3  | 1-E05     | 1         | Autophagy inducers | 67526-95-8  | BML-PE180   | 10mM  | ER Stress/SERCA inhib.                        |
| Calcimycin             | 523.3  | 1-E06     | 1         | Autophagy inducers | 52665-69-7  | BML-CA100   | 10mM  | ER stress                                     |
| Capsaicin              | 305.2  | 1-E07     | 1         | Autophagy inducers | 404-86-4    | BML-EI125   | 10mM  | ER stress/p38,ERK inhib                       |
| Dihydrocapsaicin       | 307.2  | 1-E08     | 1         | Autophagy inducers | 19408-84-5  | 052         | 10mM  | ROS accumulation                              |
| Glucosamine HCl        | 215.1  | 1-E09     | 1         | Autophagy inducers | 66-84-2     | AC1513      | 10mM  | mTOR                                          |

|                                 |            |                  |                  |                      |                  |                    |              |                                                                         |
|---------------------------------|------------|------------------|------------------|----------------------|------------------|--------------------|--------------|-------------------------------------------------------------------------|
| DTT                             | 154.0      | 1-E10            | 1                | Autophagy inducers   | 3483-12-3        | ALX-280-001 BML-   | 10mM         | ER stress/lysosome degradinhb                                           |
| Deoxycholate-Na                 | 414.3      | 1-E11            | 1                | Autophagy inducers   | 302-95-4         | AC1508 ALX-430-    | 10mM         | Beclin1- ER stress/DNA damage                                           |
| HA 14-1                         | 408.0      | 1-F02            | 1                | Autophagy inducers   | 65673-63-4       | 101 ALX-430-       | 10mM         | Bcl-2 inhib.                                                            |
| Licochalcone A                  | 338.2      | 1-F03            | 1                | Autophagy inducers   | 58749-22-7       | 124 ALX-350-       | 10mM         | Bcl-2/mTOR inhib.                                                       |
| Curcumin                        | 368.1      | 1-F04            | 1                | Autophagy inducers   | 458-37-7         | 028                | 10mM         | Akt/mTOR/S6K path inhib                                                 |
| Plumbagin                       | 188.0      | 1-F05            | 1                | Autophagy inducers   | 481-42-5         | BML-AP505          | 10mM         | Akt/mTOR inhib.                                                         |
| 6-Gingerol                      | 294.2      | 1-F06            | 1                | Autophagy inducers   | 23513-14-6       | BML-CA422 BML-     | 10mM         | ROS induction                                                           |
| Akt Inhibitor X-HCl             | 380.1      | 1-F07            | 1                | Autophagy inducers   | 925681-41-6      | AC1509 ALX-270-    | 10mM         | Akt Inhibitor                                                           |
| PMSF                            | 174.0      | 1-F08            | 1                | Autophagy inducers   | 329-98-6         | 184                | 10mM         | Protease Inhibitor                                                      |
| MG132                           | 475.3      | 1-F09            | 1                | Autophagy inducers   | 133407-82-6      | BML-PI102          | 10mM         | Proteasome inhibitor                                                    |
| ALLN                            | 383.3      | 1-F10            | 1                | Autophagy inducers   | 110044-82-1      | BML-P120 BML-      | 10mM         | Proteasome inhibitor                                                    |
| 7-Ketocholesterol               | 400.3      | 1-F11            | 1                | Autophagy inducers   | 566-28-9         | AC1511             | 10mM         | Mitochondrial stress                                                    |
| 17-AAG                          | 585.3      | 1-G02            | 1                | Autophagy inducers   | 75747-14-7       | BML-EI308          | 10mM         | Hsp90 inhibitor                                                         |
| Geldanamycin                    | 560.3      | 1-G03            | 1                | Autophagy inducers   | 30562-34-6       | BML-EI280          | 10mM         | Hsp90 inhibitor                                                         |
| C1                              | 242.1      | 1-G04            | 1                | Autophagy inducers   | 143413-73-4      | BML-AP500          | 10mM         | ROS/non-Beclin1 dependent                                               |
| Z36                             | 393.2      | 1-G05            | 1                | Autophagy inducers   | N/A              | BML-ST200 ALX-270- | 10mM         | Bcl-XL inhibitor                                                        |
| Rockout                         | 194.1      | 1-G06            | 1                | Autophagy inducers   | 7272-84-6        | 429                | 10mM         | Rho kinase Inhibitor                                                    |
| Go6850                          | 412.2      | 1-G07            | 1                | Autophagy inducers   | 133052-90-1      | BML-EI246 BML-     | 10mM         | PKC Inhibitor                                                           |
| 2-Deoxyglucose                  | 164.1      | 1-G08            | 1                | Autophagy inducers   | 154-17-6         | AC1512 BML-        | 10mM         | Blocks glycolysis                                                       |
| Etoposide                       | 588.2      | 1-G09            | 1                | Autophagy inducers   | 33419-42-0       | GR307              | 10mM         | Topoisomerase II Inhibitor                                              |
| SMER28                          | 263.0      | 1-G10            | 1                | Autophagy inducers   | 307538-42-7      | BML-EI397 BML-     | 10mM         | Increasesautophagosomeclearance                                         |
| Trehalose                       | 342.1      | 1-G11            | 1                | Autophagy inducers   | 99-20-7          | AC1507             | 10mM         | Increases Beclin-1 and autophagins                                      |
| C <sub>2</sub> -dihydroceramide | 343.3      | 1-H02            | 1                | Autophagy inducers   | 13031-64-6       | BML-SL101 ALX-420- | 10mM         | Inducesautophagosomeformn                                               |
| Temozolomide                    | 194.1      | 1-H03            | 1                | Autophagy inducers   | 85622-93-1       | 044                | 10mM         | LocalizesLC3toautophagosomes                                            |
| Resveratrol                     | 228.1      | 1-H04            | 1                | Autophagy inducers   | 501-36-0         | BML-FR104          | 10mM         | Inhibits S6 kinase                                                      |
| Staurosporine                   | 466.2      | 1-H05            | 1                | Autophagy inducers   | 62996-74-1       | BML-EI156 BML-     | 10mM         | Apoptosis control                                                       |
| <b>Small Molecules</b>          | <b>Mwt</b> | <b>Sample ID</b> | <b>Plate num</b> | <b>INHIBITOR</b>     | <b>CAS Datab</b> | <b>Enzo ID</b>     | <b>Stock</b> | <b>Cell Signaling</b>                                                   |
| Bafilomycin A1                  | 606.4      | 2-A02            | 2                | Autophagy inhibitors | 88899-55-2       | CM110              | 1mM          | V-ATPase inhib                                                          |
| 3-Methyladenine                 | 149.1      | 2-A03            | 2                | Autophagy inhibitors | 5142-23-4        | BML-AP502          | 10mM         | PI3K inhib                                                              |
| LY294002                        | 307.1      | 2-A04            | 2                | Autophagy inhibitors | 154447-36-6      | BML-ST420          | 10mM         | PI3K inhib                                                              |
| Wortmannin                      | 428.1      | 2-A05            | 2                | Autophagy inhibitors | 19545-26-7       | BML-ST415          | 10mM         | PI3K inhib                                                              |
| SP600125                        | 220.1      | 2-A06            | 2                | Autophagy inhibitors | 129-56-6         | BML-EI305          | 10mM         | JNK inhib.                                                              |
| Chloroquine                     | 319.2      | 2-A07            | 2                | Autophagy inhibitors | 54-05-7          | BML-DL353 BML-     | 10mM         | Lysosomes (decreases pH)                                                |
| Hydroxychloroquine              | 335.2      | 2-A08            | 2                | Autophagy inhibitors | 118-42-3         | AC1500 BML-        | 10mM         | Lysosomes (decreases pH)                                                |
| Norclomipramine-HCl             | 336.1      | 2-A09            | 2                | Autophagy inhibitors | 303-48-0         | AC1501             | 10mM         | Lysosomes (decreases pH)                                                |
| (±)Bay K8644                    | 356.1      | 2-A10            | 2                | Autophagy inhibitors | 71145-03-4       | BML-CA410 BML-     | 10mM         | L-type Ca2+ agonist                                                     |
| Forskolin                       | 410.2      | 2-A11            | 2                | Autophagy inhibitors | 66428-89-5       | CN100 BML-         | 10mM         | adenylyl cyclase activator                                              |
| Dibutyryl cAMP-Na               | 491.1      | 2-B02            | 2                | Autophagy inhibitors | 16980-89-5       | CN125 BML-         | 10mM         | cAMP agonist                                                            |
| Rolipram                        | 275.2      | 2-B03            | 2                | Autophagy inhibitors | 61413-54-5       | PD177 BML-         | 10mM         | PDE4 Inhibitor(decrease cAMP)                                           |
| 8-CPT-cAMP-Na                   | 493.0      | 2-B04            | 2                | Autophagy inhibitors | 93882-12-3       | CN130 BML-         | 10mM         | Epac activator                                                          |
| EHNA-HCl                        | 313.2      | 2-B05            | 2                | Autophagy inhibitors | 51350-19-7       | PD129 ALX-550-     | 10mM         | Dynein inhibitor                                                        |
| Tolazamide                      | 311.1      | 2-B07            | 2                | Autophagy inhibitors | 1156-19-0        | 216 BML-           | 10mM         | ATP-K+ channel antagonist                                               |
| Quinine HCl·2H <sub>2</sub> O   | 396.2      | 2-B08            | 2                | Autophagy inhibitors | 6119-47-7        | AC1516             | 10mM         | ATP-K+ channel antagonist                                               |
| AICAR                           | 258.1      | 2-B09            | 2                | Autophagy inhibitors | 2627-69-2        | BML-EI330          | 10mM         | Class III PI3K/Beclin1 binding                                          |
| PD-98059                        | 267.1      | 2-B10            | 2                | Autophagy inhibitors | 167869-21-8      | BML-EI360          | 10mM         | ERK pathway activator                                                   |
| Anisomycin                      | 265.1      | 2-B11            | 2                | Autophagy inhibitors | 22862-76-6       | BML-ST102 ALX-380- | 10mM         | p38 MAPK activator                                                      |
| Cycloheximide                   | 281.2      | 2-C02            | 2                | Autophagy inhibitors | 66-81-9          | 269                | 10mM         | protein synthesis(CMA)                                                  |
| Pifithrin-μ                     | 181.0      | 2-C03            | 2                | Autophagy inhibitors | 64984-31-2       | BML-AP503          | 10mM         | HSP70 inhibitor                                                         |
| Nocodazole LNP Alone            | 301.1      | 2-C04<br>2-C05   | 2                | Autophagy inhibitors | 31430-18-9       | BML-T101           | 10mM         | Inhibits autophagosome/lysosome fusion;<br>Microtubule depolymerization |

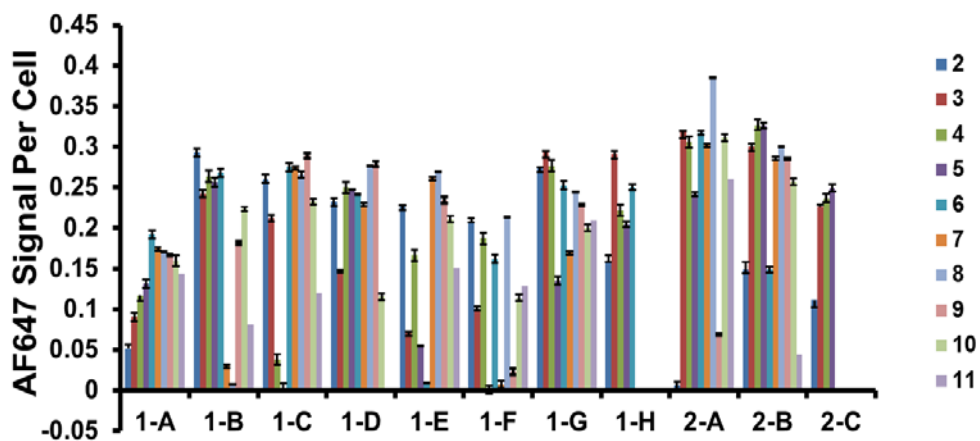

### Small molecule library

Supplemental Information-Excel : Quantitative analysis of siRNA uptake in presence of small molecules: HeLa cells were exposed to LNPs (siAF647) in presence of small molecules for 3 hrs, cells were washed and uptake was quantified with the use of Acapella software. Experiments were conducted in triplicate with error measured as Standard error Mean (S.E.M)

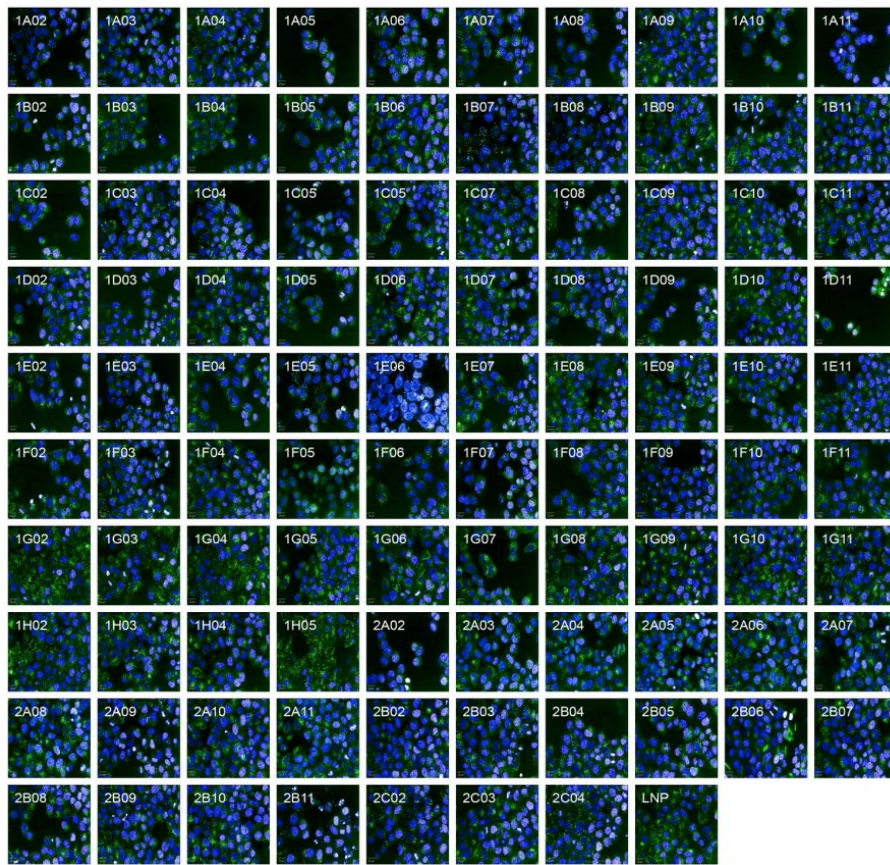

Supplemental Information-Excel : A representative image from different treatment groups (20 fields) are shown for the treatment groups mentioned above.
