# Supplementary material
Source: PubMed Central journal article supplement (PMC3814166)
Supplement: NIHMS482144-supplement-4.pdf [file NIHMS482144-supplement-4.pdf]

**Table S1:** Cellular regulators that impact LNP trafficking and their known endocytic function.

| <b>Cellular Effectors</b>          | <b>Influence on intracellular trafficking</b>                                                                                                                                                                                                                                                            | <b>References</b> |
|------------------------------------|----------------------------------------------------------------------------------------------------------------------------------------------------------------------------------------------------------------------------------------------------------------------------------------------------------|-------------------|
| <b>Calcium Homeostasis</b>         | Acts as a signaling molecule to mediate exocytosis, calcium homeostasis in lysosomes necessary to maintain function, deregulation of such a homeostasis augments lysosomal storage disorders.                                                                                                            | 1–3               |
| <b>Arachidonic Acid Metabolism</b> | Present as fatty acid in phospholipids of cell membrane is generated by activity of phospholipase A-2 and regulates signaling mediators like phospholipase C (PLC). Both regulate membrane fusion and tubule formation in the endolysosomal system. Arachidonic acid is a key inflammatory intermediary. | 4–6               |
| <b>V<sub>o</sub>-ATPase</b>        | Maintains acidic pH of endocytic vesicles<br>Submembranous pH regulates micropinosome formation.                                                                                                                                                                                                         | 7,8               |
| <b>Cathepsins</b>                  | Proteases in endocytic compartments (especially lysosomes) that degrade proteins or lipids.<br>Involved in endosomal escape of viruses.                                                                                                                                                                  | 9–11              |
| <b>JNK1/MAPK8</b>                  | Signaling molecule activated by growth factors known to induce macropinocytosis,<br>Associated with cytoskeleton and endocytic vesicles                                                                                                                                                                  | 12,13             |
| <b>p38</b>                         | Subset of MAPK pathway, signaling molecule that regulates formation of early endosomes.                                                                                                                                                                                                                  | 14                |
| <b>PKC</b>                         | PKC is involved in membrane ruffling and micropinosome formation.                                                                                                                                                                                                                                        | 12                |
| <b>NFkB</b>                        | Main function in inflammation and cancer little known about impact to cellular trafficking.                                                                                                                                                                                                              | 15                |
| <b>mTOR</b>                        | Late endosomes form an active site for mTOR mediated cell signaling and mTOR in turn regulates lysosomal biogenesis.                                                                                                                                                                                     | 16,17             |
| <b>Chloride Homeostasis</b>        | Defects in chloride channels linked to defective endocytosis in renal tubules and also implicated in lysosomal neurodegenerative disorders.                                                                                                                                                              | 18,19             |

**Abbreviations:** JNK1-c-Jun N-Terminal Kinase, MAPK8- Mitogen-activated protein kinase 8, PKC- Protein Kinase C, NFkB- Nuclear factor kappa B, mTOR- mammalian target of rapamycin.

## **REFERENCES:**

1. Berridge, M. J., Lipp, P. & Bootman, M. D. The versatility and universality of calcium signalling. *Nat. Rev. Mol. Cell Biol.* **1**, 11–21 (2000).
2. Berridge, M. J., Bootman, M. D. & Roderick, H. L. Calcium signalling: dynamics, homeostasis and remodelling. *Nat. Rev. Mol. Cell Biol.* **4**, 517–529 (2003).
3. Lloyd-Evans, E. *et al.* Niemann-Pick disease type C1 is a sphingosine storage disease that causes deregulation of lysosomal calcium. *Nature Medicine* **14**, 1247–1255 (2008).
4. Brown, W. J., Chambers, K. & Doody, A. Phospholipase A2 (PLA2) enzymes in membrane trafficking: mediators of membrane shape and function. *Traffic* **4**, 214–221 (2003).
5. Marshall, J. C. Such stuff as dreams are made on: mediator-directed therapy in sepsis. *Nature Reviews Drug Discovery* **2**, 391–405 (2003).
6. Lemmon, M. A. Membrane recognition by phospholipid-binding domains. *Nature Reviews Molecular Cell Biology* **9**, 99–111 (2008).
7. Casey, J. R., Grinstein, S. & Orlowski, J. Sensors and regulators of intracellular pH. *Nature Reviews Molecular Cell Biology* **11**, 50–61 (2009).
8. Koivusalo, M. *et al.* Amiloride inhibits macropinocytosis by lowering submembranous pH and preventing Rac1 and Cdc42 signaling. *J. Cell Biol.* **188**, 547–563 (2010).
9. Saftig, P. & Klumperman, J. Lysosome biogenesis and lysosomal membrane proteins: trafficking meets function. *Nature Reviews Molecular Cell Biology* **10**, 623–635 (2009).
10. Fineschi, B. & Miller, J. Endosomal proteases and antigen processing. *Trends in Biochemical Sciences* **22**, 377–382 (1997).
11. Schornberg, K. *et al.* Role of Endosomal Cathepsins in Entry Mediated by the Ebola Virus Glycoprotein. *J. Virol.* **80**, 4174–4178 (2006).
12. Mercer, J. & Helenius, A. Virus entry by macropinocytosis. *Nature Cell Biology* **11**, 510–520 (2009).
13. Mengistu, M., Brotzman, H., Ghadiali, S. & Lowe-Krentz, L. Fluid shear stress-induced JNK activity leads to actin remodeling for cell alignment. *J. Cell. Physiol.* **226**, 110–121 (2011).
14. Cavalli, V. *et al.* The Stress-Induced MAP Kinase p38 Regulates Endocytic Trafficking via the GDI:Rab5 Complex. *Molecular Cell* **7**, 421–432 (2001).
15. Ben-Neriah, Y. & Karin, M. Inflammation meets cancer, with NF- $\kappa$ B as the matchmaker. *Nature Immunology* **12**, 715–723 (2011).
16. Flinn, R. J., Yan, Y., Goswami, S., Parker, P. J. & Backer, J. M. The late endosome is essential for mTORC1 signaling. *Mol. Biol. Cell* **21**, 833–841 (2010).
17. Yu, L. *et al.* Termination of autophagy and reformation of lysosomes regulated by mTOR. *Nature* **465**, 942–946 (2010).
18. Christensen, E. I. *et al.* Loss of chloride channel ClC-5 impairs endocytosis by defective trafficking of megalin and cubilin in kidney proximal tubules. *PNAS* **100**, 8472–8477 (2003).
19. Kasper, D. *et al.* Loss of the chloride channel ClC-7 leads to lysosomal storage disease and neurodegeneration. *The EMBO Journal* **24**, 1079–1091 (2005).
